# Supplementary material for: Mangrove Crab Ucides cordatus Removal Does Not Affect Sediment Parameters and Stipule Production in a One Year Experiment in Northern Brazil
Source: PubMed Central journal article supplement (PMC5131973; doi:10.1371/journal.pone.0167375), 2016-12-01

**S1 Figure. *Ucides cordatus* capture success.** Mean crab capture success  $\pm$  standard error (se) (crabs  $d^{-1}$  net $^{-1}$ ) for the removal plots from November 2011 until November 2012. Crab capture was conducted biweekly during neap tides for 3-6 days. Crab capture success was calculated considering both living animals and carapace remains.

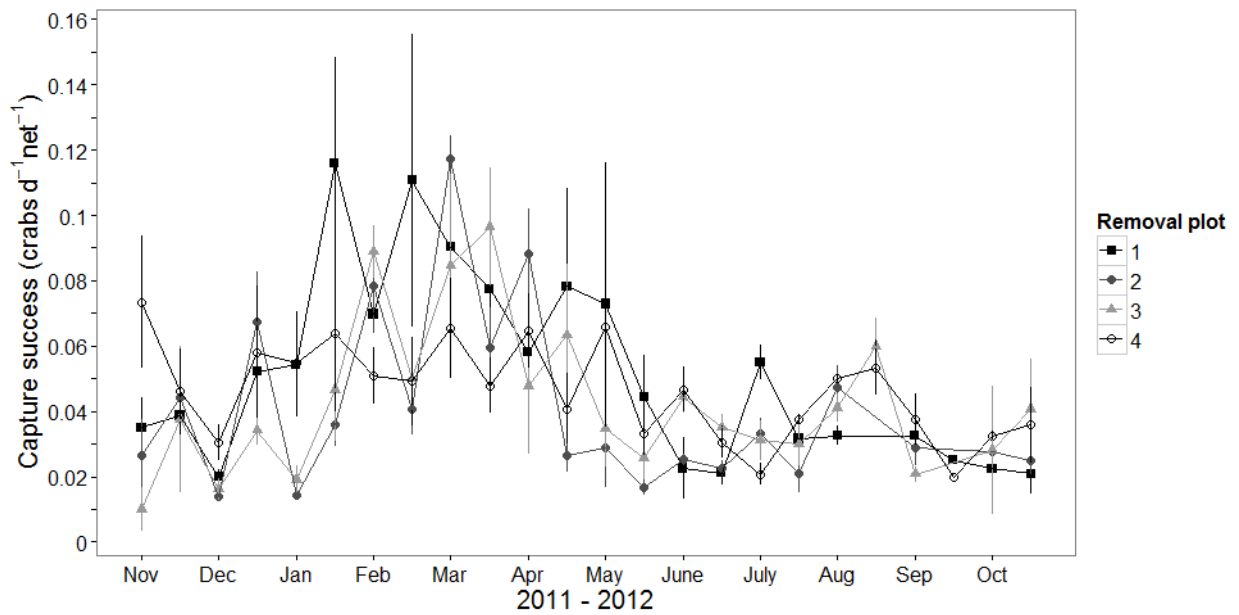

Supplement: pone.0167375.s001.pdf [file pone.0167375.s001.pdf]
