# Supplementary material for: Mangrove Crab Ucides cordatus Removal Does Not Affect Sediment Parameters and Stipule Production in a One Year Experiment in Northern Brazil
Source: PubMed Central journal article supplement (PMC5131973; doi:10.1371/journal.pone.0167375), 2016-12-01
Supplement: pone.0167375.s003.pdf [file pone.0167375.s003.pdf]

## S2 File. Final linear mixed-effects model of the sediment salinity.

The final optimal model was selected after a stepwise backwards model selection using the likelihood ratio test:

$$\begin{aligned} \text{Sediment salinity}_{icp} \sim & \alpha + \text{Treatment}_{icp} + \text{Sediment depth}_{icp} + \text{Time}_{icp} + \text{Treatment}_{icp} \times \\ & \text{Sediment depth}_{icp} + \text{Treatment}_{icp} \times \text{Time}_{icp} + \text{Sediment depth}_{icp} \times \text{Time}_{icp} + \text{Treatment}_{icp} \times \\ & \text{Sediment depth}_{icp} \times \text{Time}_{icp} + a_p + a_{c/p} + \varepsilon_{icp}, \quad \varepsilon_{icp} \sim N(0, \sigma^2) \end{aligned}$$

Sediment salinity<sub>icp</sub> is the observation *i* for each sediment core *c* at each plot *p*, where *c* runs from 1 to 3, *p* from 1 to 12 and *i* is the observation for each core at the different sites that goes from 1 to 7 (the number of samplings over time). The final model above means that Sediment salinity is modelled as a function of Treatment, Sediment depth, Time, and all their two and three way interactions. Treatment and Time are a categorical covariate and Sediment depth is continuous. Time was set as categorical covariate, because differences between points of time were not linear. The terms *a<sub>p</sub>* and *a<sub>c/p</sub>* are random effects representing the between-plot and between-core variation and are significant (L. Ratio = 71.7, df = 1, *p*-value < 0.001, nested term: L. Ratio = 449.1, df = 1, *p*-value < 0.001). The unexplained variance  $\varepsilon_{ics}$  is assumed to be normally distributed with mean 0 and variance  $\sigma^2$  considered for each sediment depth *d* separately. The intercept of the model is represented with  $\alpha$ .
