# Supplementary material for: Mangrove Crab Ucides cordatus Removal Does Not Affect Sediment Parameters and Stipule Production in a One Year Experiment in Northern Brazil
Source: PubMed Central journal article supplement (PMC5131973; doi:10.1371/journal.pone.0167375), 2016-12-01
Supplement: pone.0167375.s006.pdf [file pone.0167375.s006.pdf]

## S5 File. Final linear mixed-effects model of the rH value.

The final optimal model was selected after a stepwise backwards model selection using the likelihood ratio test:

$$rH_{icp} \sim \alpha + Treatment_{icp} + Sediment\ depth_{icp} + Time_{icp} + Treatment_{icp} \times Sediment\ depth_{icp} + Treatment_{icp} \times Time_{icp} + Sediment\ depth_{icp} \times Time_{icp} + Treatment_{icp} \times Sediment\ depth_{icp} \times Time_{icp} + a_p + a_{c/p} + \epsilon_{icp}, \quad \epsilon_{icp} \sim N(0, \sigma^2)$$

$rH_{icp}$  is the observation  $i$  for each sediment core  $c$  at each plot  $p$ , where  $c$  runs from 1 to 3,  $p$  from 1 to 12 and  $i$  is the observation for each core at the different sites that goes from 1 to 8 (the number of samplings over time). The final model above means that rH is modelled as a function of Treatment, Sediment depth, Time, and all their two and three way interactions. Treatment and Time are a categorical covariate and Sediment depth is continuous. Time was set as categorical covariate, because differences between points of time were not linear. The terms  $a_p$  and  $a_{c/p}$  are random effects representing the between-plot and between-core variation and are significant (L. Ratio = 288.4,  $df = 1$ ,  $p$ -value < 0.001, nested term: L. Ratio = 378.8,  $df = 1$ ,  $p$ -value < 0.001). The unexplained variance  $\epsilon_{ics}$  is assumed to be normally distributed with mean 0 and variance  $\sigma^2$  considered for each sediment depth  $d$  separately. The intercept of the model is represented with  $\alpha$ .
