# Supplementary material for: Mangrove Crab Ucides cordatus Removal Does Not Affect Sediment Parameters and Stipule Production in a One Year Experiment in Northern Brazil
Source: PubMed Central journal article supplement (PMC5131973; doi:10.1371/journal.pone.0167375), 2016-12-01
Supplement: pone.0167375.s007.pdf [file pone.0167375.s007.pdf]

## S6 File. Final linear mixed-effects model of the stipule fall rate.

The final optimal model was selected after a stepwise backwards model selection using the likelihood ratio test:

$$\text{Stipule fall rate}_{ip} \sim \alpha + s(\text{Time})_{ip} + a_p + \varepsilon_{ip}, \quad \varepsilon_{ip} \sim N(0, \sigma^2)$$

Stipule fall rate<sub>ip</sub> is the observation *i* for each plot *p*, where *p* runs from 1 to 12 and *i* is the observation within a plot which goes from 1 to 24 (the number of samplings over time). The final model above means that Stipule fall rate is modelled as a function of Time. Time is a continuous variable. The notation *s* stands for smoothing function of time. The terms *a<sub>p</sub>* and *a<sub>u/p</sub>* are random effects representing the between-plot and between-core variation and are significant (L. Ratio = 15.0, df = 1, *p*-value < 0.001). The unexplained variance  $\varepsilon_{ip}$  is assumed to be normally distributed with mean 0 and variance  $\sigma^2$ . The intercept of the model is represented with  $\alpha$ .
