# Supplementary material for: Mangrove Crab Ucides cordatus Removal Does Not Affect Sediment Parameters and Stipule Production in a One Year Experiment in Northern Brazil
Source: PubMed Central journal article supplement (PMC5131973; doi:10.1371/journal.pone.0167375), 2016-12-01
Supplement: pone.0167375.s008.pdf [file pone.0167375.s008.pdf]

**S1 Table. List of *Ucides cordatus* burrow densities in plots.** *U. cordatus* burrow density (burrows m<sup>-2</sup>) samples were taken in the high intertidal zone during neap tides at the Furo Grande, Caeté estuary, North Brazil. Data complete for removal plots, but selectively measured for the remaining treatments. Data in grey shaded columns correspond to the first and last parameter samplings. Other burrow counts were taken during the crab catching campaigns between parameter samplings.

| <b>Removal plots</b>             | <b>Nov 2011</b> | <b>Dec 2012</b> | <b>Jan 2012</b> | <b>Feb 2012</b> | <b>Apr 2012</b> | <b>May 2012</b> | <b>June 2012</b> | <b>July 2012</b> | <b>Aug 2012</b> | <b>Sept 2012</b> | <b>Oct 2012</b> | <b>Nov 2012</b> |
|----------------------------------|-----------------|-----------------|-----------------|-----------------|-----------------|-----------------|------------------|------------------|-----------------|------------------|-----------------|-----------------|
| 1                                | 4.7             | 2.2             | 2.5             | 2.3             | 2.8             | 2.0             | 2.2              | 2.5              | 3.5             | 3.2              | 2.9             | 2.1             |
| 2                                | 6.7             | 5.3             | 3.1             | 2.5             | 3.7             | 2.6             | 2.2              | 4.3              | 4.0             | 2.8              | 3.5             | 3.9             |
| 3                                | 3.1             | 1.8             | 1.9             | 1.2             | 2.7             | 1.5             | 1.3              | 1.2              | 1.3             | 1.3              | 1.4             | 0.5             |
| 4                                | na              | 4.4             | 4.6             | 3.0             | 2.0             | 2.4             | 2.7              | 3.1              | 3.7             | 3.4              | 3.2             | 3.2             |
| <b>Control plots</b>             |                 |                 |                 |                 |                 |                 |                  |                  |                 |                  |                 |                 |
| 1                                | na              | na              | na              | na              | na              | na              | na               | na               | na              | 3.3              | 3.6             | 3.3             |
| 2                                | na              | na              | na              | na              | na              | na              | na               | na               | na              | 3.8              | 4.8             | 3.7             |
| 3                                | na              | na              | na              | na              | na              | na              | na               | na               | na              | 2.4              | 5.6             | 3.5             |
| 4                                | na              | na              | na              | na              | na              | na              | na               | na               | na              | 2.6              | 4.2             | 3.5             |
| <b>Disturbance control plots</b> |                 |                 |                 |                 |                 |                 |                  |                  |                 |                  |                 |                 |
| 1                                | na              | na              | na              | na              | na              | na              | na               | na               | na              | 2.6              | 4.5             | 3.8             |
| 2                                | na              | na              | na              | na              | na              | na              | na               | na               | na              | 3.1              | 4.5             | 3.3             |
| 3                                | na              | na              | na              | na              | na              | na              | na               | na               | na              | 3.5              | 4.4             | 4.4             |
| 4                                | na              | na              | na              | na              | na              | na              | na               | na               | na              | 2.8              | 2.3             | 2.0             |
